# Supplementary material for: Pervasive Sharing of Causal Genetic Risk Factors Contributes to Clinical and Molecular Overlap between Sjögren’s Disease and Systemic Lupus Erythematosus
Source: Int J Mol Sci. 2023 Sep 22;24(19):14449. doi: 10.3390/ijms241914449 (PMC10572278; doi:10.3390/ijms241914449)
Supplement: Supplementary file 1 [file ijms-24-14449-s001.zip › Supplementary Tables.xlsx]

## Sheet: INDEX
SUPPLEMENTAL TABLES: Table of Contents
INDEX	Table of Contents for Supplemental Tables
Table S1	Table S1A: SjD GWAS Regions, Putative Causal Genes and Overlaps
	Table S1B: SjD Proxy Assignment for Khatri, et al. Table 1
Table S2	Table S2: Links to online resources
Table S3	Table S3A: Index of SjD genome-wide sifnificant variant Tables
	Table S3B: SjD genome-wide significant variants
	Table S3C: TwoSample MR formatted SjD variants from GWAS in cohorts of persons with European ancestry (EUR)
	Table S3D: TwoSample MR formatted SjD variants from GWAS in cohorts of persons with East Asian ancestry (EAS)
Table S4	Table S4: MR Analysis summary EUR SjD causal variants as effect, EUR SLE GWAS as outcome
Table S5	Table S5A: Post-QC EUR SLE causal variant list in TwoSampleMR format
	Table S5B: MR Analysis summary EUR SLE causal variants as effect, EUR (Finngen) SjD GWAS as outcome
Table S6	Table S6: MR Analysis summary EAS SjD causal variants as effect, EAS SLE GWAS as outcome
Table S7	Table S7: MR Analysis summary EAS SLE causal variants as effect, EUR (Finngen) SjD GWAS as outcome
Table S8	Table S8: Single SNP results corresponding to Figure 8 with unassociated variants of small minor allele frequency highlighted

## Sheet: S1A
Variant and risk allele	P-value	P-value annotation	RAF	OR	Beta	CI	Mapped gene	Reported trait	Trait(s)	Background trait(s)	Study accession	PMID	Authors	Location	Chromosome	Pos (hg38)	Putative Causal Gene	supporting evidence	source	P_SLE	Overlapping SLE Variant	Overlapping SLE Chr:Pos (hg38)
rs2949661-<b>C</b>	0.00220003			0.91	-0.0943107	[0.85668661,0.9666312]	CD247	Systemic lupus erythematosus	systemic lupus erythematosus	'-		25569266, 22004975	Li, R & Martins,M	1:167455687	1	167455687	CD247	1-to-1	Bentham_results_Khatri_SNPs; wang_results_khatri_snps	0.00220003	rs704853	1:167499627
rs9630991-<b>A</b>	1 x 10-13		NR	0.85	'-	[0.81-0.89]	RN7SKP179, NAB1	Systemic lupus erythematosus	systemic lupus erythematosus	'-	GCST011096	33536424	Wang YF	2:190567413	2	190567413	NEMP2, NAB1	Proxy3	182 SLE Loci	1e-13	rs9630991-<b>A</b>	2:190567413
rs10168266-<b>T</b>	2e-17		0.3357	1.44	'-	[1.32-1.57]	STAT4	Sjögren's syndrome	Sjogren syndrome	'-	GCST002217			2:191071078	2	191071078	STAT4	https://genetics.opentargets.org/study/GCST90018920	OTG	NA	rs10168266-<b>T</b>	2:191079016
rs485497-<b>A</b>	1e-10		0.48	1.3	'-	[1.16–1.46]	IL12A-AS1	Sjögren's syndrome	Sjogren syndrome	'-	GCST004878			3:160001345	3	160001345	Il12A	https://genetics.opentargets.org/study/GCST004878	OTG	NA	rs77583790-<b>A</b>	3:159976265
rs6579837-<b>T</b>	3e-08		0.09	1.43	'-	[1.20–1.71]	TNIP1	Sjögren's syndrome	Sjogren syndrome	'-	GCST004878			5:151055333	5	151055333	TNIP1	https://genetics.opentargets.org/study/GCST004878	OTG	NA	rs10036748-<b>T</b>	5:151078585
rs2431697-<b>T</b>	1 x 10-28		0.833	1.241	'-	[1.2-1.28]	MIR3142HG	Systemic lupus erythematosus	systemic lupus erythematosus	'-	GCST011956	33272962	Yin X	5:160452971	5	160452971	PTTG1, MIR3142HG	1-to-1	182 SLE Loci	1e-28	rs2431697-<b>T</b>	5:160452971
rs2523571-<b>A</b>	6e-28		NR	'-	0.709 unit increase	[0.58-0.84]	HLA-B, DHFRP2	Sjögren's syndrome	Sjogren syndrome	'-	GCST90018920			6:31361914	6	31361914		SjD EBI GWAS	SjD EBI GWAS	NA	NA	NA
rs3135394-<b>G</b>	5e-113		0.11	3.52	'-	[3.02–4.10]	HLA-DRA	Sjögren's syndrome	Sjogren syndrome	'-	GCST004878			6:32440720	6	32440720		SjD EBI GWAS	SjD EBI GWAS	NA	NA	NA
rs115575857-<b>G</b>	8e-114		0.12	3.53	'-	[3.03–4.11]	MTCO3P1, HLA-DQB1	Sjögren's syndrome	Sjogren syndrome	'-	GCST004878			6:32691868	6	32691868	C4A, C4B	**manually reassigned from HLA-DRA to C4A/C4B based off of:https://www.nature.com/articles/s41586-020-2277-x https://pubmed.ncbi.nlm.nih.gov/32499649/	literature	NA	NA	NA
rs4282438-<b>G</b>	9e-25		0.3546	1.58	'-	[1.45-1.72]	COL11A2P1	Sjögren's syndrome	Sjogren syndrome	'-	GCST002217			6:33104395	6	33104395		SjD EBI GWAS	SjD EBI GWAS	NA	NA	NA
rs548234-<b>T</b>	6 x 10-39		0.705	0.819	'-	[0.79-0.85]	ATG5	Systemic lupus erythematosus	systemic lupus erythematosus	'-	GCST011956	33272962	Yin X	6:106120159	6	106120159	ATG5	Proxy4	182 SLE Loci	6e-39	rs548234-<b>T</b>	6:106120159
rs5029939-<b>G</b>	8e-09		0.0445	1.67	'-	[1.40-1.99]	TNFAIP3	Sjögren's syndrome	Sjogren syndrome	'-	GCST002217			6:137874586	6	137874586	TNFAIP3	https://genetics.opentargets.org/study/GCST002217	OTG	NA	rs9494894-<b>T</b>	6:137907383
rs9494894-<b>T</b>	3 x 10-84		0.941	0.586	'-	[0.53-0.64]	LINC02528, TNFAIP3	Systemic lupus erythematosus	systemic lupus erythematosus	'-	GCST011956	33272962	Yin X	6:137907383	6	137907383	TNFAIP3, OLIG3	Proxy2	182 SLE Loci	3e-84	rs9494894-<b>T</b>	6:137907383
rs117026326-<b>T</b>	1e-53		0.1501	2.2	'-	[1.99-2.42]	GTF2I	Sjögren's syndrome	Sjogren syndrome	'-	GCST002217			7:74711703	7	74711703	NCF1	*Manually reassigned from GTF2I to NCF1 based on : https://pubmed.ncbi.nlm.nih.gov/28135245/	literature	NA	rs117026326-<b>T</b>	7:74711703
rs3757387-<b>C</b>	3e-19		0.45	1.44	'-	[1.29–1.62]	KCP, IRF5	Sjögren's syndrome	Sjogren syndrome	'-	GCST004878			7:128936032	7	128936032	IRF5	https://genetics.opentargets.org/study/GCST90018920	OTG	NA	rs10488631-<b>C</b>	7:128954129
rs17339836-<b>T</b>	2e-16		0.12	1.58	'-	[1.36–1.84]	TNPO3	Sjögren's syndrome	Sjogren syndrome	'-	GCST004878			7:129041008	7	129041008	TNPO3, IRF5	https://genetics.opentargets.org/study/GCST004878	OTG	NA	rs10488631-<b>C</b>	7:128954129
rs7819602-<b>?</b>	1 x 10-9		NR	1.15	'-	[1.10-1.20]	PINX1, XKR6	Systemic lupus erythematosus	systemic lupus erythematosus	'-	GCST007400	28714469	Langefeld CD	8:10869332	8	10869332	XKR6	Proxy6	182 SLE Loci	1e-09	rs7819602-<b>?</b>	8:10869332
rs2736345-<b>G</b>	5e-10		0.29	1.3	'-	[1.16–1.47]	BLK	Sjögren's syndrome	Sjogren syndrome	'-	GCST004878			8:11494976	8	11494976	BLK	https://genetics.opentargets.org/study/GCST004878	OTG	NA	rs2736345-<b>G</b>	8:11494976
rs7119038-<b>A</b>	1e-08		0.77	1.35135	'-	[1.16-1.56]	Y_RNA, CXCR5	Sjögren's syndrome	Sjogren syndrome	'-	GCST004878			11:118867572	11	118867572		SjD EBI GWAS	SjD EBI GWAS	NA	rs480958-<b>A</b>	11:118707281
rs114038709-<b>T</b>	4 x 10-8		NR	1.16	'-	[1.11-1.22]	RNA5SP443, ARHGAP27	Systemic lupus erythematosus	systemic lupus erythematosus	'-	GCST005831	29848360	Julià A	17:45379362	17	45379362	MAPT, CRHR1	Proxy7	182 SLE Loci	4e-08	rs114038709-<b>T</b>	17:45379362
rs8071514	1.64 × 10−08											35896530	Khatri B	17:80990283	17	80990283	RPTOR, CHMP6, BAIAP6	No	PMID:35896530	NA	NA	NA
rs34536443-<b>?</b>	2 x 10-25		NR	2.12766	'-	[1.75-2.63]	TYK2	Systemic lupus erythematosus	systemic lupus erythematosus	'-	GCST005752	28714469	Langefeld CD	19:10352442	19	10352442	TYK2	Proxy1	182 SLE Loci	2e-25	rs34536443-<b>?</b>	19:10352442
rs9611155-<b>T</b>	8 x 10-9		0.761	1.137	'-	[1.09-1.18]	RPL3, SYNGR1	Systemic lupus erythematosus	systemic lupus erythematosus	'-	GCST011956	33272962	Yin X	22:39343182	22	39343182	SYNGR1	Proxy5	182 SLE Loci	8e-09	rs9611155-<b>T</b>	22:39343182

## Sheet: S1B
						GWAS	GWAS	GWAS	Immunochip	Immunochip	Immunochip	Meta
SNP rsID	Chr	Base pair (hg19/GRCh37)	minb	mafc	MAFd	O/Ie	OR (95% CI)	P value	O/I	OR (95% CI)	P value	P-value	Index Gene	Other disease	Source	SLE match	Source	Variant and risk allele	P-value	P-value annotation	RAF	OR	Beta	CI	Mapped gene	Reported trait	Trait(s)	Background trait(s)	Study accession	PubMed ID	First Author	Location	P	chromosome	position (hg38)	Region (Value)	Final Table?	Putative Causal Gene	Evidence
rs2293765	2	191520845	C	A	0.41	O	1.24 (1.17–1.32)	5.53 × 10−14	–	–	–	–	NAB1	IIM, MS, PBC, RA, SLE, SSc	GWAS	Proxy3	182 SLE Loci	rs9630991-<b>A</b>	1 x 10-13		NR	0.85	'-	[0.81-0.89]	RN7SKP179, NAB1	Systemic lupus erythematosus	systemic lupus erythematosus	'-	GCST011096	33536424	Wang YF	2:190567413	1E-13	2	190567413	31	1	NEMP2, NAB1	https://genetics.opentargets.org/study/GCST011096
rs2431697	5	159879978	C	T	0.42	O	0.83 (0.79–0.88)	3.33 × 10−09	I	0.91 (0.79–1.04)	0.17	6.61 × 10−09	PTTG1-MIR146A	SLE	GWAS	1-to-1	182 SLE Loci	rs2431697-<b>T</b>	1 x 10-28		0.833	1.241	'-	[1.2-1.28]	MIR3142HG	Systemic lupus erythematosus	systemic lupus erythematosus	'-	GCST011956	33272962	Yin X	5:160452971	1e-28	5	160452971	65	1	PTTG1, MIR3142HG	https://genetics.opentargets.org/study/GCST011956
rs11250098	8	10818607	A	G	0.48	I	1.16 (1.09–1.23)	3.87 × 10−07	I	1.39 (1.22–1.58)	7.77 × 10−07	6.89 × 10−12	XKR6	Asthma, SLE	GWAS	Proxy6	182 SLE Loci	rs7819602-<b>?</b>	1 x 10-9		NR	1.15	'-	[1.10-1.20]	PINX1, XKR6	Systemic lupus erythematosus	systemic lupus erythematosus	'-	GCST007400	28714469	Langefeld CD	8:10869332	1E-9	8	10869332	91	1	XKR6	https://pubmed.ncbi.nlm.nih.gov/35896530/
rs7210219	17	44018519	C	T	0.19	I	0.78 (0.72–0.84)	2.40 × 10−10	–	–	–	–	MAPT-CRHR1	PBC, SLE	GWAS	Proxy7	182 SLE Loci	rs114038709-<b>T</b>	4 x 10-8		NR	1.16	'-	[1.11-1.22]	RNA5SP443, ARHGAP27	Systemic lupus erythematosus	systemic lupus erythematosus	'-	GCST005831	29848360	Julià A	17:45379362	4e-08	17	45379362	155	1	MAPT, CRHR1	https://pubmed.ncbi.nlm.nih.gov/35896530/
rs8071514	17	78964083	C	A	0.44	I	0.84 (0.79–0.89)	1.64 × 10−08	–	–	–	–	RPTOR-CHMP6-BAIAP6		GWAS	No	NA	NA	NA	NA	NA	NA	NA	NA	NA	NA	NA	NA	NA	NA	NA	NA	NA	17	80990283			RPTOR, CHMP6, BAIAP6	https://pubmed.ncbi.nlm.nih.gov/35896530/
rs2304256	19	10475652	A	C	0.28	O	0.79 (0.74–0.84)	9.14 × 10−12	I	0.95 (0.82–1.11)	0.55	5.38 × 10−10	TYK2	ATD, IIM, MS, PBC, RA, SLE, SSc, T1DM	GWAS	Proxy1	182 SLE Loci	rs34536443-<b>?</b>	2 x 10-25		NR	2.12766	'-	[1.75-2.63]	TYK2	Systemic lupus erythematosus	systemic lupus erythematosus	'-	GCST005752	28714469	Langefeld CD	19:10352442	2E-25	19	10352442	164	1	TYK2	https://genetics.opentargets.org/study/GCST005752
rs2069235	22	39747780	A	G	0.31	I	1.21 (1.14–1.28)	5.06 × 10−10	–	–	–	–	SYNGR1	PBC, RA, SLE	GWAS	Proxy5	182 SLE Loci	rs9611155-<b>T</b>	8 x 10-9		0.761	1.137	'-	[1.09-1.18]	RPL3, SYNGR1	Systemic lupus erythematosus	systemic lupus erythematosus	'-	GCST011956	33272962	Yin X	22:39343182	8E-9	22	39343182	176	1	SYNGR1	https://genetics.opentargets.org/study/GCST011956
rs2949661	1	167424924	T	C	0.37	I	0.86 (0.81–0.91)	2.20 × 10−06	I	0.84 (0.73–0.96)	1.41 × 10−02	9.99 × 10−08	CD247	Asthma, ATD, RA, SLE, SSc	META	1-to-1	PMID: 22004975	rs2949661-<b>C</b>	0.00220003			0.91	-0.0943107	[0.85668661,0.9666312]	CD247	Systemic lupus erythematosus	systemic lupus erythematosus	'-		PMID: 25569266, 22004975	Li, R & Martins,M	1:167455687	0.00220003	1	167455687			CD247	https://pubmed.ncbi.nlm.nih.gov/25569266/ | https://pubmed.ncbi.nlm.nih.gov/22004975/
rs526531	6	106570056	A	G	0.32	I	1.13 (1.07–1.21)	2.1 × 10−05	O	1.28 (1.11–1.47)	3.84 × 10−04	4.86 × 10−08	PRDM1-ATG5	Asthma, RA, SLE SSc	META	Proxy4	182 SLE Loci	rs548234-<b>T</b>	6 x 10-39		0.705	0.819	'-	[0.79-0.85]	ATG5	Systemic lupus erythematosus	systemic lupus erythematosus	'-	GCST011956	33272962	Yin X	6:106120159	6e-39	6	106120159	80	1	ATG5	https://genetics.opentargets.org/study/GCST005752
rs2230926	6	138196066	G	T	0.03	O	1.43 (1.25–1.65)	3.33 × 10−07	I	1.26 (0.91–1.75)	1.59 × 10−01	2.93 × 10−07	TNFAIP3	RA, SLE, SSc	META	Proxy2	182 SLE Loci	rs9494894-<b>T</b>	3 x 10-84		0.941	0.586	'-	[0.53-0.64]	LINC02528, TNFAIP3	Systemic lupus erythematosus	systemic lupus erythematosus	'-	GCST011956	33272962	Yin X	6:137907383	3E-84	6	137907383	82	1	TNFAIP3, OLIG3	https://genetics.opentargets.org/study/GCST011956

## Sheet: S2
Resource Description	Link	Accessed
SjD putative causal gene STRING PPI Network	https://version-11-5.string-db.org/cgi/network?networkId=be8bMHI2iXIA	(Accessed 06 June 2023)
SLE monogenic causal gene STRING PPI Network	https://doi.org/10.18119/N99K6Q	(Accessed 06 June 2023)
SLE polygenic putative causal gene STRING PPI Network	https://doi.org/10.18119/N95W22	(Accessed 06 June 2023)
SLE monogenic and putative polygenic causal gene STRING PPI Network	https://doi.org/10.18119/N9231T	(Accessed 06 June 2023)
SjD putative causal gene Enrichr results	https://maayanlab.cloud/Enrichr/enrich?dataset=541d464ff5dd5bf55ba6720d896342cd	(Accessed 06 June 2023)
SjD putative causal gene ToppGene results	https://toppgene.cchmc.org/output.jsp?userdata_id=367f3867-fc8d-415d-96da-bba421b5a818	(Accessed 06 June 2023)
SjD putative causal gene NDEXBio Integrated Query results	https://www.ndexbio.org/iquery/1d0056d1-f832-40e0-9f5a-846ef9bc54f0/enrichment/ee26142d-5c73-11ec-b3be-0ac135e8bacf	(Accessed 06 June 2023)
Figure 1 Network: SjD Network	https://www.ndexbio.org/viewer/networks/99b77fa6-478b-11ee-aa50-005056ae23aa	(Accessed 06 June 2023)
Figure 2 Network: SLE monogenic and polygenic Network Merged with SjD Network	https://www.ndexbio.org/viewer/networks/ad1450f8-478b-11ee-aa50-005056ae23aa	(Accessed 06 June 2023)
FinnGen M13_Sjogrens Table and Manhattan Plot	http://r8.finngen.fi/pheno/M13_SJOGREN	(Accessed 06 June 2023)
BioBank Japan Sjogren_Syndrome Table and Manhattan Plot	https://pheweb.jp/pheno/Sjogren_Syndrome	(Accessed 06 June 2023)

## Sheet: S3A
Table of GWS variants	Table of TwoSampleMR formatted variants	Source (Accessed 17 May 2023)	Ancestry		Content	Sjogren Compilation Table Legends
ST3B	ST3C	https://pubmed.ncbi.nlm.nih.gov/24097067/	EUR	Lessard 2013	Sjogren Significant Regions	Significant regions associated with Sjogren’s Syndrome are listed from the Lessard et al. paper. Significant regions are defined as those with a P-value less than 5E-8.
ST3B	ST3D	https://www.nature.com/articles/ng.2779/	EAS	Li 2013	Sjogren's Signgicant Regions	Significant regions associated with Sjogren’s Syndrome are listed from the Li et al. paper. Significant regions are defined as those with a P-value less than 5E-8.
ST3B	ST3C	https://pubmed.ncbi.nlm.nih.gov/35896530/	EUR	Khatri 2022	Sjogren's Signgicant Regions	Significant regions associated with Sjogren’s Syndrome are listed from the Khatri et al. paper. Significant regions are defined as those with a P-value less than 5E-8.
ST3B	ST3D	https://pubmed.ncbi.nlm.nih.gov/27503288/	EAS	Song 2016	Sjogren Significant Regions	Significant regions associated with Sjogren’s Syndrome are listed from the Song et al. paper. Significant regions are defined as those with a P-value less than 5E-8.
ST3B	ST3D	https://pubmed.ncbi.nlm.nih.gov/28552951/	EAS	Qu 2017	Sjogren Significant Regions	Significant regions associated with Sjogren’s Syndrome are listed from the Qu et al. paper. Significant regions are defined as those with a P-value less than 5E-8.
ST3B	ST3C	https://r9.finngen.fi/pheno/M13_SJOGREN	EUR	Kurki 2023	Sjogren Significant Regions	Significant regions associated with Sjogren’s Syndrome are listed from the Beta 8 database of genes associated with Sjogren’s Syndrome. Significant regions are defined as those with a P-value less than 5E-8.
ST3B	ST3D	https://pheweb.jp/pheno/Sjogren_Syndrome	EAS	Sakaue 2021	Sjogren Significant Regions	Significant regions associated with Sjogren’s Syndrome are listed from the BioBank Japan database of genes associated with Sjogren’s Syndrome. Significant regions are defined as those with a P-value less than 5E-8.

## Sheet: S3B
https://pubmed.ncbi.nlm.nih.gov/24097067/ (accessed 17 May 2023)
Table 1 Top associations in the HLA regions	SNP	CHR	BP (hg19)	A1 (major)	F_A (A2)	F_U (A2)	A2 (minor)	CHISQ	P	OR (A2)	SE	L95	U95	Beta
HLA-DRA	rs112357081	6		TCTAA	0.59	0.33	T		1.01e-32	2.89	0.0886684	2.43	3.44	1.06126
HLA-DRA	rs3135394	6		A	0.27	0.11	G		5.2e-113	3.52	0.0779924	3.02	4.1	1.25846
HLA-DQB1	rs15575857	6		A	0.29	0.12	G		7.7e-114	3.53	0.0777705	3.03	4.11	1.2613
HLA-DQB1	rs3129716	6		T	0.29	0.12	C		4.6e-112	3.45	0.0759521	2.97	4	1.23837
HILA-DQA1	rs16232857	6		A	0.64	0.42	G		1.3e-96	2.53	0.0623331	2.24	2.86	0.928219
HILA-DQA1	rs9271588	6		T	0.27	0.48	C		1.4e-85	0.41	0.0625312	0.36	0.46	-0.8916
Table 2 Non-HLA regions associated with Sjögren’s syndrome exceeding genome-wide significant threshold	SNP	CHR	BP (hg19)	A1 (major)	F_A (A2)	F_U (A2)	A2 (minor)	CHISQ	P	OR (A2)	SE	L95	U95	Beta
IRF5	rs3757387	7		T	0.54	0.45	C		2.7e-19	1.44	0.0581081	1.29	1.62	0.364643
IRF5	rs4728142	7		G	0.53	0.44	A		9.8e-17	1.4	0.0581459	1.25	1.57	0.336472
IRF5	rs17339836	7		C	0.18	0.12	T		2.4e-16	1.58	0.0771125	1.36	1.84	0.457425
IRF5	rs17338998	7		C	0.18	0.12	T		2.7e-16	1.57	0.0776049	1.35	1.83	0.451076
IRF5	rs10954213	7		A	0.34	0.38	G		3.2e-06	0.82	0.0590125	0.73	0.92	-0.19845
STAT4	rs10553577	2		TATA	0.3	0.23	T		6.8e-15	1.43	0.0641108	1.26	1.62	0.357674
STAT4	rs13426947	2		G	0.24	0.19	A		9.5e-09	1.32	0.0672678	1.16	1.51	0.277632
IL12A	rs485497	3		G	0.54	0.48	A		1.2e-10	1.3	0.0586777	1.16	1.46	0.262364
IL12A	rs583911	3		A	0.48	0.42	G		9.9e-09	1.27	0.0582753	1.13	1.42	0.239017
BLK	rs2736345	8		A	0.36	0.29	G		5e-10	1.3	0.060419	1.16	1.47	0.262364
BLK	rs2729935	8		C	0.41	0.35	A		6.9e-10	1.3	0.0586777	1.16	1.46	0.262364
BLK	rs6998387	8		G	0.37	0.32	A		8e-08	1.26	0.0605429	1.12	1.42	0.231112
CXCR5	rs7119038	11		A	0.18	0.23	G		1.1e-08	0.74	0.0753735	0.64	0.86	-0.30111
CXCR5	rs4936443	11		T	0.16	0.2	C		6.8e-08	0.75	0.0743676	0.65	0.87	-0.28768
TNIP1	rs6579837	5		G	0.12	0.09	T		3.3e-08	1.43	0.0903499	1.2	1.71	0.357674
TNIP1	rs7732451	5		A	0.15	0.12	G		5.3e-07	1.34	0.0816447	1.14	1.57	0.29267
https://www.nature.com/articles/ng.2779/ (accessed 17 May 2023)
Table 1 summary of association results for three non-MHC sNPs and two representative MHC sNPs associated with primary sjögren’s syndrome in Han Chinese	SNP	CHR	BP (hg19)	A1 (major)	F_A (A2)	F_U (A2)	A2 (minor)	CHISQ	P	OR (A2)	SE	L95	U95	Beta
GTF2I	rs117026326	7	74126034	C	0.283	0.1501	T		1.31e-53	2.2	0.0509583	1.99	2.43	0.788457
STAT4	rs10168266	2	191935804	C	0.4234	0.3357	T		1.77e-17	1.44	0.0442459	1.32	1.57	0.364643
TNFAlP3	rs5029939	6	138195723	C	0.0722	0.0445	G		7.75e-09	1.67	0.0897098	1.4	1.99	0.512824
HLA-DRB1, HLA-DQA1	rs9271588	6	32590953	T	0.3329	0.4681	C		8.52e-37	0.57	0.0440926	0.53	0.63	-0.562119
HLA-DPB1, COL11A2	rs4282438	6	33072172	T	0.4566	0.3546	G		8.77e-25	1.58	0.0435614	1.45	1.72	0.457425
https://pubmed.ncbi.nlm.nih.gov/35896530/ (accessed 17 May 2023)
Table 1 Summary results of the GWAS and meta-analysis of Sjögren’s of European Ancestry	SNP	CHR	BP	A1 (major)	F_A	F_U (A2)	A2 (minor)	CHISQ	P	OR (A2)	SE	L95	U95	Beta
NAB1	rs2293765	2	191520845	A		0.41	C		5.53e-14	1.24	0.0307724	1.17	1.32	0.215111
NAB1	rs11900804	2	191533767	T		0.42	C		2.44e-12	1.22	0.0290674	1.16	1.3	0.198851
NAB1	rs2192008	2	191545147	G		0.42	A		1.37e-12	1.23	0.0290674	1.16	1.3	0.207014
NAB1	rs744600	2	191564757	T		0.38	G		2.89e-12	1.22	0.0290674	1.16	1.3	0.198851
NAB1	rs10202868	2	191563991	T		0.25	C		0.000549	0.88	0.034448	0.83	0.95	-0.127833
PTTG1-MIR146A	rs2910194	5	159844175	C		0.49	T		0.000153	1.11	0.0297766	1.05	1.18	0.10436
PTTG1-MIR146A	rs2431698	5	159884083	G		0.47	T		2.65e-08	0.84	0.0240274	0.81	0.89	-0.174353
PTTG1-MIR146A	rs2431697	5	159879978	T		0.42	C		3.33e-09	0.83	0.0275227	0.79	0.88	-0.18633
PTTG1-MIR146A	rs2431099	5	159886620	G		0.47	A		2.36e-08	0.84	0.0271964	0.8	0.89	-0.174353
XKR6	rs4841466	8	10828909	C		0.46	T		3.77e-08	1.17	0.0282529	1.11	1.24	0.157004
XKR6	rs11250098	8	10818607	G		0.48	A		3.87e-07	1.16	0.0308256	1.09	1.23	0.14842
XKR6	rs11250099	8	10818657	G		0.47	A		5.99e-08	1.17	0.0305615	1.1	1.24	0.157004
XKR6	rs4841465	8	10819854	T		0.48	C		9.42e-08	1.17	0.0284959	1.1	1.23	0.157004
XKR6	rs3885690	8	10826869	T		0.37	C		5.47e-07	0.85	0.0328655	0.8	0.91	-0.162519
MAPT-CRHR1	rs7210219	17	44018519	T		0.19	C		2.4e-10	0.78	0.0393242	0.72	0.84	-0.248461
MAPT-CRHR1	rs2696609	17	44293205	A		0.2	G		2.7e-10	0.78	0.0393242	0.72	0.84	-0.248461
MAPT-CRHR1	rs7215239	17	43767773	T		0.21	C		8.74e-09	0.8	0.0349131	0.75	0.86	-0.223144
RPTOR-CHMP6-BAIAP6	rs8071514	17	78964083	А		0.44	с		1.64e-08	0.84	0.0304052	0.79	0.89	-0.174353
RPTOR-CHMP6-BAIAP6	rs6565516	17	78965146	G		0.41	А		1.26e-07	0.85	0.0300467	0.8	0.9	-0.162519
RPTOR-CHMP6-BAIAP6	rs4969331	17	78966915	T		0.41	C		2.13e-07	0.85	0.0300467	0.8	0.9	-0.162519
TYK2	rs11085725	19	10462513	C		0.28	T		7.17e-13	0.78	0.0327503	0.73	0.83	-0.248461
TYK2	rs74908652	19	10828909	T		0.16	C		0.0454	0.92	0.038895	0.85	0.99	-0.0833816
TYK2	rs753859	19	10531224	G		0.48	C		2.56e-06	0.87	0.0293544	0.82	0.92	-0.139262
TYK2	rs34953890	19	10526854	C		0.2	А		1.94e-06	0.83	0.0369467	0.77	0.89	-0.18633
TYK2	rs23042S6	19	10475652	C		0.28	А		9.14e-12	0.79	0.0323346	0.74	0.84	-0.235722
SYNGR1	rs2069235	22	39747780	G		0.31	A		5.06e-10	1.21	0.0295489	1.14	1.28	0.19062
SYNGR1	rs909685	22	39747671	T		0.31	A		5.9e-10	1.21	0.0295489	1.14	1.28	0.19062
SYNGR1	rs3747177	22	39747780	C		0.24	A		3.93e-09	1.21	0.0335041	1.14	1.3	0.19062
SYNGR1	rs5757611	22	39708357	C		0.22	T		1.7e-07	1.19	0.0343512	1.11	1.27	0.173953
CD247	rs7523907	1	167427247	T		0.42	C		9.33e-09	0.85	0.0300467	0.8	0.9	-0.162519
CD247	rs2949661	1	167424924	C		0.37	T		9.99e-08	0.86	1.20448	0.81	91	-0.150823
CD247	rs1723018	1	167433420	T		0.38	C		3.22e-08	0.86	0.0296965	0.81	0.91	-0.150823
CD247	rs2056626	1	167420425	T		0.39	G		5.94e-08	0.86	0.0296965	0.81	0.91	-0.150823
CD247	rs864537	1	167411384	A		0.39	G		0.000251	0.92	0.0277558	0.87	0.97	-0.0833816
PRDM1-ATG5	rs526531	6	106570056	G		0.32	A		4.86e-08	1.13	0.0313678	1.07	1.21	0.122218
PRDM1-ATG5	rs533733	6	106564236	G		0.33	A		3.25e-07	1.14	0.0313678	1.07	1.21	0.131028
PRDM1-ATG5	rs7768653	6	106574794	T		0.41	C		5.49e-06	1.13	0.0295113	1.06	1.19	0.122218
PRDM1-ATG5	rs4946728	6	106590363	C		0.25	A		0.000762	1.09	0.0328106	1.02	1.16	0.0861777
TNFAIP3	rs61117627	6	138243700	G		0.03	A		3.32e-08	1.45	0.0718653	1.26	1.67	0.371564
TNFAIP3	rs58905141	6	138132123	A		0.03	G		2.16e-07	1.44	0.075947	1.24	1.67	0.364643
TNFAIP3	rs5029937	6	138195151	G		0.03	T		2.93e-07	1.43	0.0708244	1.25	1.65	0.357674
TNFAIP3	rs5029924	6	138187498	C		0.03	T		4.62e-07	1.42	0.071828	1.23	1.63	0.350657
TNFAIP3	rs2230926	6	138196066	T		0.03	G		2.93e-07	1.43	0.0708244	1.25	1.65	0.357674
TNFAIP3	rs7749323	6	138230389	G		0.03	A		6.17e-07	1.43	0.0749391	1.23	1.65	0.357674
https://pubmed.ncbi.nlm.nih.gov/27503288/ (accessed 17 May 2023)
Table 1 Association analysis results of the top SNPs in female primary Sjögren’s syndrome patients	SNP	CHR	BP	A1	F_A	F_U	A2	CHISQ	P	OR	SE	L95	U95	Beta	RISK ALLELE	STAGE
GTF21	rs117026326	7	74126034	T	0.104	0.219	C		6.71e-13	2.417	0.125789	1.889	3.093	0.882527	T	GWAS
GTF21	rs117026326	7	74126034	T	0.121	0.201	C		5.38e-06	1.831	0.133911	1.408	2.38	0.604862	T	Replication
GTF21	rs117026326	7	74126034	T	0.119	0.211	C		1.1e-15	1.982	0.0864657	1.673	2.348	0.684106	T	Combincd
RBMS3	rs13079920	3	29445931	A	0.295	0.386	G		3.96e-05	1.502	0.101909	1.23	1.834	0.406798	A	GWAS
RBMS3	rs13079920	3	29445931	A	0.312	0.367	G		0.0264	1.277	0.110934	1.028	1.588	0.244514	A	Replication
RBMS3	rs13079920	3	29445931	A	0.311	0.378	G		2.9e-05	1.349	0.0721873	1.171	1.554	0.299364	A	Combined
https://pubmed.ncbi.nlm.nih.gov/28552951/ (accessed 17 May 2023)
Table 2. Summary of association results for two SNPs associated with primary Sjo ̈ gren’s syndrome in Han Chinese	SNP	CHR	BP	A1 (major)	F_A (A2)	F_U (A2)	A2 (minor)	CHISQ	P	OR	SE	L95	U95	Beta
IKZF1	rs4917129	7	50323174	T	0.2075	0.2509	C		0.000549	0.72	0.0947866	0.6	0.87	-0.328504	Current study
IKZF1	rs4917129	7	50323174	T	0.191	0.2595	C		1.81e-05	0.68	0.0941575	0.56	0.81	-0.385662	Pre-GWASd
IKZF1	rs4917129	7	50323174	T	0.2001	0.2556	C		4.2e-08	0.7	0.0659628	0.61	0.79	-0.356675	Combined
IKZF1	rs4917014	7	50305863	T	0.2609	0.3045	G		0.00115	0.76	0.0841207	0.64	0.89	-0.274437	Current study
IKZF1	rs4917014	7	50305863	T	0.2431	0.3161	G		9.86e-06	0.68	0.0896423	0.57	0.81	-0.385662	Pre-GWASd
IKZF1	rs4917014	7	50305863	T	0.2529	0.3109	G		6.02e-08	0.72	0.0600934	0.64	0.81	-0.328504	Combined
https://r8.finngen.fi/pheno/M13_SJOGREN (accessed 17 May 2023)	Values from Table @ https://r9.finngen.fi/pheno/M13_SJOGREN P < 5E-8 (accessed 17 May 2023)
Variant_EPACTS (chr:pos_ref/alt	SNP	CHR	BP	A1 (ref)	F_A (A2)	F_U (A2)	A2 (alt & effect)	CHISQ	P	OR	SE	L95	U95	beta
6:31657087_A/G	rs3117581	6	31657087	A	0.175149	0.0907032	G		5.77298e-76	2.08197	0.0397579			0.733315
6:32164195_G/C	rs3132941	6	32164195	G	0.177902	0.0943432	C		1.3406e-72	2.03407	0.0394013			0.710038
6:32711549_C/T	rs9275576	6	32711549	C	0.182929	0.099791	T		1.15478e-69	1.98365	0.0388224			0.684938
7:128938247_T/G	rs2004640	7	128938247	T	0.414318	0.477285	G		2.16421e-18	0.780305	0.0283561			-0.24807
6:25874195_G/A	rs13198474	6	25874195	G	0.0685371	0.0467095	A		8.45474e-12	1.5016	0.0595158			0.40653
2:191108308_G/A	rs10174238	2	191108308	G	0.725327	0.764699	A		2.56059e-10	0.814975	0.0323563			-0.204598
7:74606017_G/A	rs150724213	7	74606017	G	0.0431797	0.0285531	A		1.98962e-09	1.5691	0.0751009			0.450504
7:75546817_G/C	rs41281072	7	75546817	G	0.0376981	0.0243344	C		1.44424e-08	1.57734	0.0804049			0.45574
https://pheweb.jp/pheno/Sjogren_Syndrome (accessed 17 May 2023)	SNP	CHR	BP	A1 (ref)	F_A	F_U	A2 (alt & effect)	CHISQ	P	OR	SE	L95	U95	beta
TSBP1	rs56036302	6	32272156	A		0.2	T		6.1e-10		0.11			0.67

## Sheet: S3C
SNP	effect_allele	beta	se	other_allele	eaf
rs112357081	T	1.06126	0.0886684	TCTAA	0.33
rs3135394	G	1.25846	0.0779924	A	0.11
rs15575857	G	1.2613	0.0777705	A	0.12
rs3129716	C	1.23837	0.0759521	T	0.12
rs16232857	G	0.928219	0.0623331	A	0.42
rs9271588	C	-0.891598	0.0625312	T	0.48
rs3757387	C	0.364643	0.0581081	T	0.45
rs4728142	A	0.336472	0.0581459	G	0.44
rs17339836	T	0.457425	0.0771125	C	0.12
rs17338998	T	0.451076	0.0776049	C	0.12
rs10954213	G	-0.198451	0.0590125	A	0.38
rs10553577	T	0.357674	0.0641108	TATA	0.23
rs13426947	A	0.277632	0.0672678	G	0.19
rs485497	A	0.262364	0.0586777	G	0.48
rs583911	G	0.239017	0.0582753	A	0.42
rs2736345	G	0.262364	0.060419	A	0.29
rs2729935	A	0.262364	0.0586777	C	0.35
rs6998387	A	0.231112	0.0605429	G	0.32
rs7119038	G	-0.301105	0.0753735	A	0.23
rs4936443	C	-0.287682	0.0743676	T	0.2
rs6579837	T	0.357674	0.09035	G	0.09
rs7732451	G	0.29267	0.0816447	A	0.12
rs2293765	C	0.215111	0.0318981	A	0.41
rs11900804	C	0.198851	0.0324048	T	0.42
rs2192008	A	0.207014	0.0282398	G	0.42
rs744600	G	0.198851	0.0324048	T	0.38
rs10202868	C	-0.127833	0.0390511	T	0.25
rs2910194	T	0.10436	0.0312012	C	0.49
rs2431698	T	-0.174353	0.0294998	G	0.47
rs2431697	C	-0.18633	0.029845	T	0.42
rs2431099	A	-0.174353	0.0294998	G	0.47
rs4841466	T	0.157004	0.0296467	C	0.46
rs11250098	A	0.14842	0.029895	G	0.48
rs11250099	A	0.157004	0.0296467	G	0.47
rs4841465	C	0.157004	0.0255155	T	0.48
rs3885690	C	-0.162519	0.0348001	T	0.37
rs7210219	C	-0.248461	0.0378102	T	0.19
rs2696609	G	-0.248461	0.0378102	A	0.2
rs7215239	C	-0.223144	0.0368983	T	0.21
rs8071514	с	-0.174353	0.0294998	А	0.44
rs6S65516	А	-0.162519	0.0291625	G	0.41
rs4969331	с	-0.162519	0.0291625	T	0.41
rs11085725	T	-0.248461	0.0316999	C	0.28
rs74908652	C	-0.0833816	0.0374139	T	0.16
rs753859	C	-0.139262	0.0285104	G	0.48
rs34953890	А	-0.18633	0.0356101	C	0.2
rs23042S6	А	-0.235722	0.0313107	C	0.28
rs2069235	A	0.19062	0.0286937	G	0.31
rs909685	A	0.19062	0.0286937	T	0.31
rs3747177	A	0.19062	0.036604	C	0.24
rs5757611	T	0.173953	0.0331957	C	0.22
rs7523907	C	-0.162519	0.0291625	T	0.42
rs2949661	T	-0.150823	2.37841	c	0.37
rs1723018	C	-0.150823	0.0288328	T	0.38
rs2056626	G	-0.150823	0.0288328	T	0.39
rs864537	G	-0.0833816	0.0270012	A	0.39
rs526531	A	0.122218	0.0348994	G	0.32
rs533733	A	0.131028	0.0304041	G	0.33
rs7768653	C	0.122218	0.0263958	T	0.41
rs4946728	A	0.0861777	0.0317563	C	0.25
rs61117627	A	0.371564	0.0720715	G	0.03
rs58905141	G	0.364643	0.0756023	A	0.03
rs5029937	T	0.357674	0.0730106	G	0.03
rs5029924	T	0.350657	0.070369	C	0.03
rs2230926	G	0.357674	0.0730106	T	0.03
rs7749323	A	0.357674	0.0730106	G	0.03
rs3117581	G	0.733315	0.0397579	A	0.0907032
rs3132941	C	0.710038	0.0394013	G	0.0943432
rs9275576	T	0.684938	0.0388224	C	0.099791
rs2004640	G	-0.24807	0.0283561	T	0.477285
rs13198474	A	0.40653	0.0595158	G	0.0467095
rs10174238	A	-0.204598	0.0323563	G	0.764699
rs150724213	A	0.450504	0.0751009	G	0.0285531
rs41281072	C	0.45574	0.0804049	G	0.0243344

## Sheet: S3D
SNP	effect_allele	beta	se	other_allele	eaf
rs117026326	T	0.788457	0.0509583	C	0.283
rs10168266	T	0.364643	0.0442459	C	0.4234
rs5029939	G	0.512824	0.0897098	C	0.0722
rs9271588	C	-0.562119	0.0440926	T	0.3329
rs4282438	G	0.457425	0.0435614	T	0.4566
rs117026326	T	0.684106	0.0864657	C	0.119
rs4917129	C	-0.356675	0.0659628	T	0.2556
rs4917014	G	-0.328504	0.0600934	T	0.3109
rs56036302	A	0.67	0.11	T	0.2

## Sheet: S4
MR Results
method	nsnp	b	se	pval
MR Egger	12	1.179	0.2713	0.001456
Weighted median	12	0.9079	0.1112	3.321e-16
Inverse variance weighted	12	0.9427	0.1274	1.37e-13
Weighted mode	12	1.149	0.121	1.242e-06
Heterogeneity Statistics
method	Q	Q_df	Q_pval
MR Egger	128.5	10	9.279e-23
Inverse variance weighted	141	11	1.015e-24
Causal Direction test
Insufficient data for analysis
Horizontal pleiotropy
Egger regression intercept:
-0.072
Standard error:
0.073
Directionality p-value:
0.348

## Sheet: S5A
SNP	effect_allele	other_allele	beta	pval	se	pheno
rs10048743	T	G	-0.231112	2.03803e-08	0.0412056	ebi-a-GCST003156
rs10912578	G	A	-0.24686	1.64778e-15	0.0309918	ebi-a-GCST003156
rs1143679	A	G	0.582216	5.0269e-48	0.0399866	ebi-a-GCST003156
rs12094036	C	T	-0.328504	1.36584e-08	0.0578595	ebi-a-GCST003156
rs12524498	T	G	-0.673345	2.48416e-08	0.120793	ebi-a-GCST003156
rs13136219	T	C	-0.174353	3.50429e-10	0.027787	ebi-a-GCST003156
rs13332649	G	A	-0.314711	5.4275e-17	0.0375683	ebi-a-GCST003156
rs143123127	A	G	0.470004	2.23172e-08	0.0840342	ebi-a-GCST003156
rs150180633	T	C	0.928219	2.66073e-41	0.0689573	ebi-a-GCST003156
rs17849501	T	C	0.81093	1.81384e-59	0.0498642	ebi-a-GCST003156
rs2431697	C	T	-0.223144	2.60136e-14	0.0292964	ebi-a-GCST003156
rs2459611	T	C	0.261365	7.62009e-09	0.045245	ebi-a-GCST003156
rs268124	T	C	0.18633	8.603e-09	0.0323703	ebi-a-GCST003156
rs34703115	C	T	-0.616186	4.08056e-09	0.104778	ebi-a-GCST003156
rs35000415	T	C	0.587787	1.8608e-45	0.041539	ebi-a-GCST003156
rs35251378	A	G	-0.235722	3.60994e-13	0.0324266	ebi-a-GCST003156
rs353608	G	A	0.18633	2.93224e-11	0.0280198	ebi-a-GCST003156
rs3747093	A	G	0.262364	2.88138e-14	0.0345055	ebi-a-GCST003156
rs389884	G	A	0.928219	2.92415e-102	0.0432319	ebi-a-GCST003156
rs4274624	T	C	-0.559616	9.73195e-66	0.0326791	ebi-a-GCST003156
rs4388254	T	C	0.378436	3.71048e-10	0.0603977	ebi-a-GCST003156
rs4916215	T	C	0.223144	5.06641e-11	0.0339693	ebi-a-GCST003156
rs58688157	G	A	-0.223144	2.96825e-11	0.0335647	ebi-a-GCST003156
rs58721818	T	C	0.65752	3.37676e-18	0.0755941	ebi-a-GCST003156
rs597808	G	A	-0.162519	3.50679e-08	0.0294736	ebi-a-GCST003156
rs6671847	A	G	0.198851	6.64049e-12	0.0289651	ebi-a-GCST003156
rs6679677	A	C	0.336472	4.54569e-13	0.0464854	ebi-a-GCST003156
rs6889239	C	T	0.277632	2.18978e-18	0.03174	ebi-a-GCST003156
rs7097397	A	G	-0.18633	8.60399e-11	0.0287118	ebi-a-GCST003156
rs73068668	A	G	-0.314711	4.39623e-08	0.0574903	ebi-a-GCST003156
rs7768653	T	C	-0.207014	3.10814e-12	0.0296891	ebi-a-GCST003156
rs7899626	T	C	0.182322	4.18572e-08	0.0332532	ebi-a-GCST003156

[truncated: 4 more sheets: S5B, S6, S7, S8]
